# Supplementary material
Source: MDPI journal article supplement (https://www.mdpi.com/2077-0472/12/8/1186)
Supplement: s1 [file s1]

**Table S1.** Description of variables used to cluster smallholders in Northern Uganda.

| Variable                                 | Description                                                    | Unit                               |
|------------------------------------------|----------------------------------------------------------------|------------------------------------|
| Household-related characteristics        |                                                                |                                    |
| Age                                      | Age of respondent                                              | years                              |
| Family size                              | Number of people living under the same roof                    | Number                             |
| Education level                          | Number of years in school for household head                   | years                              |
| Farming experience                       | Farming experience (respondent)                                | years                              |
| Household farm assets                    |                                                                | Acre                               |
| Average monthly income                   | Average monthly income, both farm and off-farm                 | USD                                |
| Total land owned                         | Total land owned by the household                              | Hectares                           |
| Value of farm assets                     | Monetary value of farm assets owned for 2019                   | USD                                |
| Proportion of land: crop production      | Proportion of the total land allocated to crop production      | percentage                         |
| Proportion of land: livestock production | Proportion of the total land allocated to livestock production | percentage                         |
| TLUs                                     | Total livestock units (TLUs)                                   | Units                              |
| Livestock value                          | Monetary value of livestock as at October 2019                 | USD                                |
| Pigeon pea related attributes            |                                                                |                                    |
| Proportion of pigeon pea sold            | Proportion of pigeon pea sold for 2019                         | percentage                         |
| Pigeon pea acreage                       | Total land used for pigeon pea production                      | Hectares                           |
| Quantity of Pigeon pea produced          | Quantity of pigeon pea produced (2019 harvest)                 | Kilogram                           |
| Intercropped pigeon pea                  | Whether farmer intercropped pigeon pea or otherwise            | Dummy; 1=intercropped, 0=otherwise |
| Number of years growing pigeon pea       | Number of years for growing pigeon pea in the household        | Years                              |

Note: Tropical Livestock Unit (TLU) conversion: cattle=1, goats, sheep and pigs=0.1, donkeys=0.5, Oxen=1.42, chicken, turkeys, ducks and guinea fowls=0.01, rabbits=0.02 (Jahnke, 1982). USD is United States dollars.

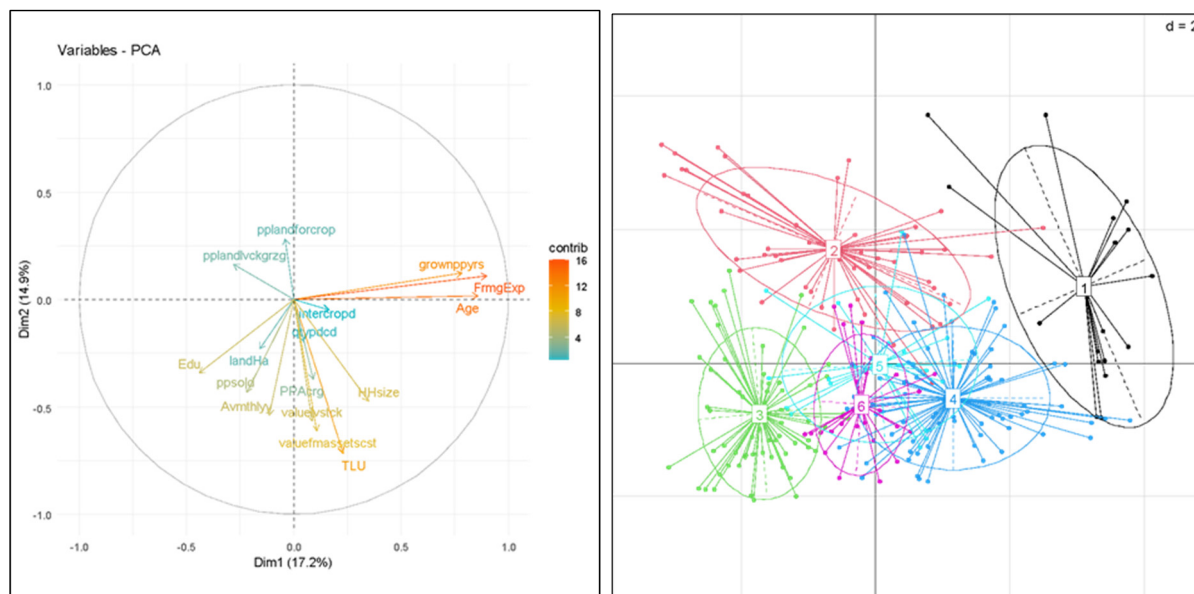

**Figure S1.** PCA and CA output (PC1-PC2), correlation circles and scatter plot along the first two principal components. The directions and lengths of arrows within the circles show the strengths of correlations between variables and PCs. Each household is connected to its individual cluster mean with a line.

**Table S2: Selected principal components, loadings, Eigenvalues and variance from PCA.**

| Variables                                | Correlations between each variable and the principal components |       |       |       |       |       |
|------------------------------------------|-----------------------------------------------------------------|-------|-------|-------|-------|-------|
|                                          | PC1                                                             | PC2   | PC3   | PC4   | PC5   | PC6   |
| Age                                      | 0.86                                                            | 0.02  | -0.12 | -0.19 | 0.01  | 0.06  |
| Family size                              | 0.35                                                            | -0.47 | 0.19  | 0.27  | 0     | -0.01 |
| Education level                          | -0.44                                                           | -0.34 | 0.09  | -0.42 | -0.11 | 0.04  |
| Farming experience                       | 0.9                                                             | 0.11  | -0.14 | -0.15 | -0.01 | -0.02 |
| Average monthly income                   | -0.15                                                           | -0.54 | 0.11  | -0.27 | 0.02  | -0.14 |
| Total land owned                         | -0.18                                                           | -0.23 | -0.74 | 0.1   | 0.27  | -0.17 |
| Value of farm assets                     | 0.07                                                            | -0.61 | -0.08 | -0.09 | -0.37 | -0.06 |
| Proportion of land: crop production      | -0.02                                                           | 0.28  | 0.67  | -0.13 | -0.19 | -0.15 |
| Proportion of land: livestock production | -0.27                                                           | 0.16  | -0.62 | 0.04  | -0.39 | -0.03 |
| Livestock value                          | 0.09                                                            | -0.57 | -0.03 | 0.29  | -0.29 | 0.14  |
| TLUs                                     | 0.23                                                            | -0.72 | 0.05  | 0.06  | -0.26 | 0.01  |
| Pigeon pea acreage                       | 0.06                                                            | -0.37 | -0.12 | -0.09 | 0.63  | -0.09 |
| Proportion of pigeon pea sold            | -0.25                                                           | -0.43 | 0.19  | -0.27 | 0.34  | 0.44  |
| Quantity of Pigeon pea produced          | 0.04                                                            | -0.19 | 0.22  | 0.12  | 0.12  | -0.82 |
| Intercropped pigeon pea                  | 0.16                                                            | -0.05 | 0.24  | 0.69  | 0.18  | 0.23  |
| Numbers of years growing pigeon pea      | 0.79                                                            | 0.12  | -0.05 | -0.24 | -0.02 | 0.03  |
| Eigen value                              | 2.75                                                            | 2.39  | 1.64  | 1.14  | 1.10  | 1.02  |
| Variance explained (%)                   | 17.2                                                            | 14.9  | 10.3  | 7.1   | 6.9   | 6.4   |
| Cumulative variance (%)                  | 17.2                                                            | 32.1  | 42.4  | 49.5  | 56.4  | 62.8  |

Source: survey data 2019. Factor loadings of > 0.400 show high correlations between selected variables and PCs.

**Table S3.** Variable mean that characterize the partitioning of the six different farmer types.

| Resource category                      | Low                | High                | Low                 | Medium              | High                | Low                 |          |
|----------------------------------------|--------------------|---------------------|---------------------|---------------------|---------------------|---------------------|----------|
| Variables                              | LEX                | HEX                 | LED                 | MEX                 | HED                 | LUN                 | p- value |
| Age                                    | 57.88 <sup>a</sup> | 38.53 <sup>d</sup>  | 29.55 <sup>d</sup>  | 48.26 <sup>b</sup>  | 42.75 <sup>c</sup>  | 38.22 <sup>c</sup>  | 0.001    |
| Family size                            | 5.24 <sup>a</sup>  | 6.75 <sup>b</sup>   | 5.27 <sup>b</sup>   | 7.97 <sup>a</sup>   | 10.05 <sup>a</sup>  | 6.89 <sup>a</sup>   | 0.001    |
| Education level                        | 3.53 <sup>c</sup>  | 5.53 <sup>ab</sup>  | 7.69 <sup>ab</sup>  | 4.04 <sup>bc</sup>  | 6.8 <sup>a</sup>    | 3.1 <sup>c</sup>    | 0.001    |
| Farming experience                     | 44.47 <sup>a</sup> | 18.73 <sup>de</sup> | 8.68 <sup>e</sup>   | 29.62 <sup>b</sup>  | 18.1 <sup>cd</sup>  | 16.61 <sup>c</sup>  | 0.001    |
| Average monthly income♦                | 11.18 <sup>b</sup> | 21.76 <sup>b</sup>  | 26.56 <sup>ab</sup> | 21.03 <sup>ab</sup> | 32.77 <sup>a</sup>  | 10.98 <sup>b</sup>  | 0.001    |
| Land owned                             | 2.92 <sup>b</sup>  | 6.36 <sup>a</sup>   | 1.59 <sup>b</sup>   | 1.34 <sup>a</sup>   | 2.38 <sup>b</sup>   | 1.12 <sup>b</sup>   | 0.001    |
| Value of farm assets                   | 18.43 <sup>b</sup> | 33.27 <sup>bc</sup> | 22.24 <sup>c</sup>  | 34.64 <sup>ab</sup> | 49.34 <sup>a</sup>  | 15.22 <sup>bc</sup> | 0.001    |
| Proportion of land: crop production    | 54.86 <sup>a</sup> | 43.96 <sup>b</sup>  | 74.28 <sup>a</sup>  | 71.11 <sup>b</sup>  | 49.11 <sup>b</sup>  | 72.96 <sup>a</sup>  | 0.001    |
| Proportion of land: livestock grazing  | 11.83 <sup>b</sup> | 20.52 <sup>a</sup>  | 9.88 <sup>b</sup>   | 5.86 <sup>b</sup>   | 8.3 <sup>b</sup>    | 10.86 <sup>b</sup>  | 0.001    |
| TLUs                                   | 2.54 <sup>b</sup>  | 3.34 <sup>bc</sup>  | 2.19 <sup>c</sup>   | 3.69 <sup>b</sup>   | 10.22 <sup>a</sup>  | 1.13 <sup>bc</sup>  | 0.001    |
| Livestock value                        | 23.77 <sup>b</sup> | 77.05 <sup>b</sup>  | 35.35 <sup>b</sup>  | 37.98 <sup>b</sup>  | 324.03 <sup>a</sup> | 10.72 <sup>b</sup>  | 0.001    |
| Pigeon pea acreage                     | 0.64 <sup>bc</sup> | 0.75 <sup>c</sup>   | 0.42 <sup>c</sup>   | 0.58 <sup>a</sup>   | 0.83 <sup>ab</sup>  | 0.36 <sup>c</sup>   | 0.001    |
| Quantity of Pigeon pea produced per Ha | 355.9 <sup>b</sup> | 374.7 <sup>b</sup>  | 364.3 <sup>b</sup>  | 401.6 <sup>b</sup>  | 475.9 <sup>ab</sup> | 327.2 <sup>a</sup>  | 0.001    |
| Proportion of pigeon pea sold          | 13.29 <sup>d</sup> | 26.79 <sup>cd</sup> | 39.62 <sup>ab</sup> | 24.64 <sup>bc</sup> | 54.31 <sup>a</sup>  | 11.64 <sup>d</sup>  | 0.001    |
| Number of years growing pigeon pea     | 38.76 <sup>a</sup> | 9.78 <sup>c</sup>   | 5.48 <sup>c</sup>   | 18.35 <sup>b</sup>  | 10.2 <sup>bc</sup>  | 7.89 <sup>bc</sup>  | 0.001    |

Survey results- 2019: Means followed by the same superscript letter in the same row are not significant different by the HSD-test at the 5% level of significance. HSD = Tukey's honestly significant difference test. LEX, LED and LUN refer to Low Resource endowed and experienced, educated and unexperienced, whereas MEX refers to Medium Resourced and Experienced, HED and HEX refer to High Resource endowed and educated or experienced. ♦ The total monthly income indicator was calculated as the sum of off- farm income and on-farm income generated from crop and livestock sales. Farm product sales were calculated from local prices, retrieved at the time of the survey.

#### A. Pigeon pea processing, marketing and consumption attributes by resource type: LUN, LEX & LED

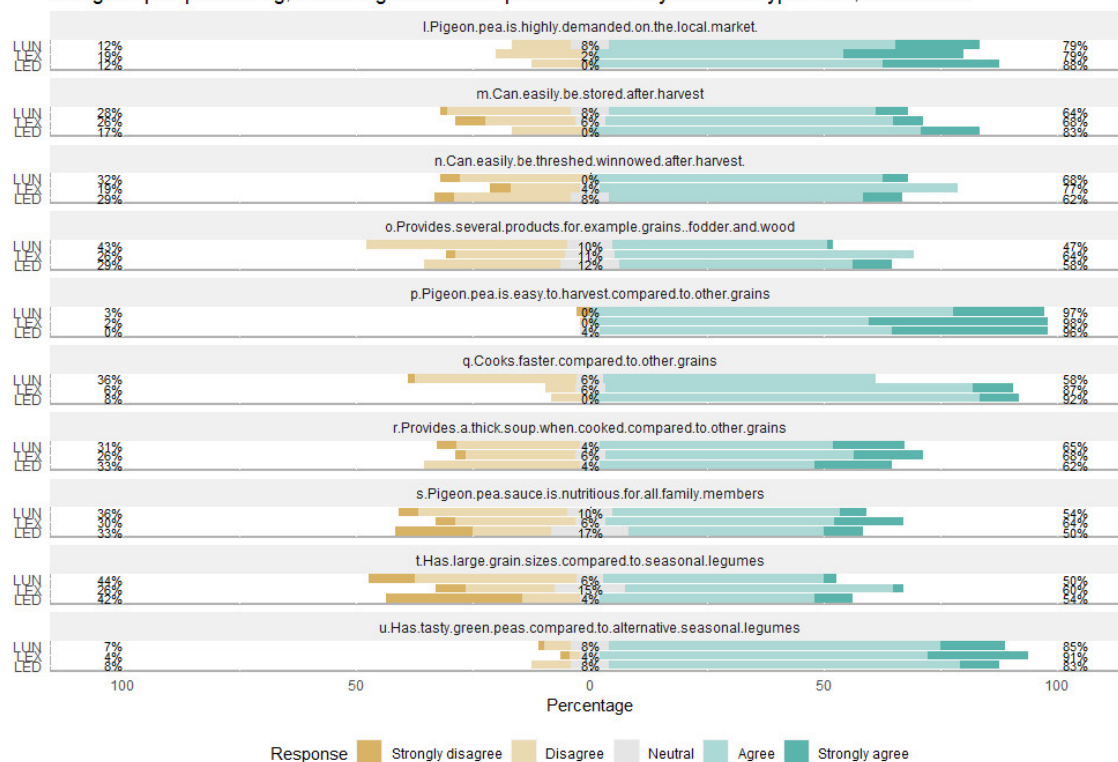

#### C. Pigeon pea processing, marketing and consumption attributes by resource type: MEX, HEX & HED

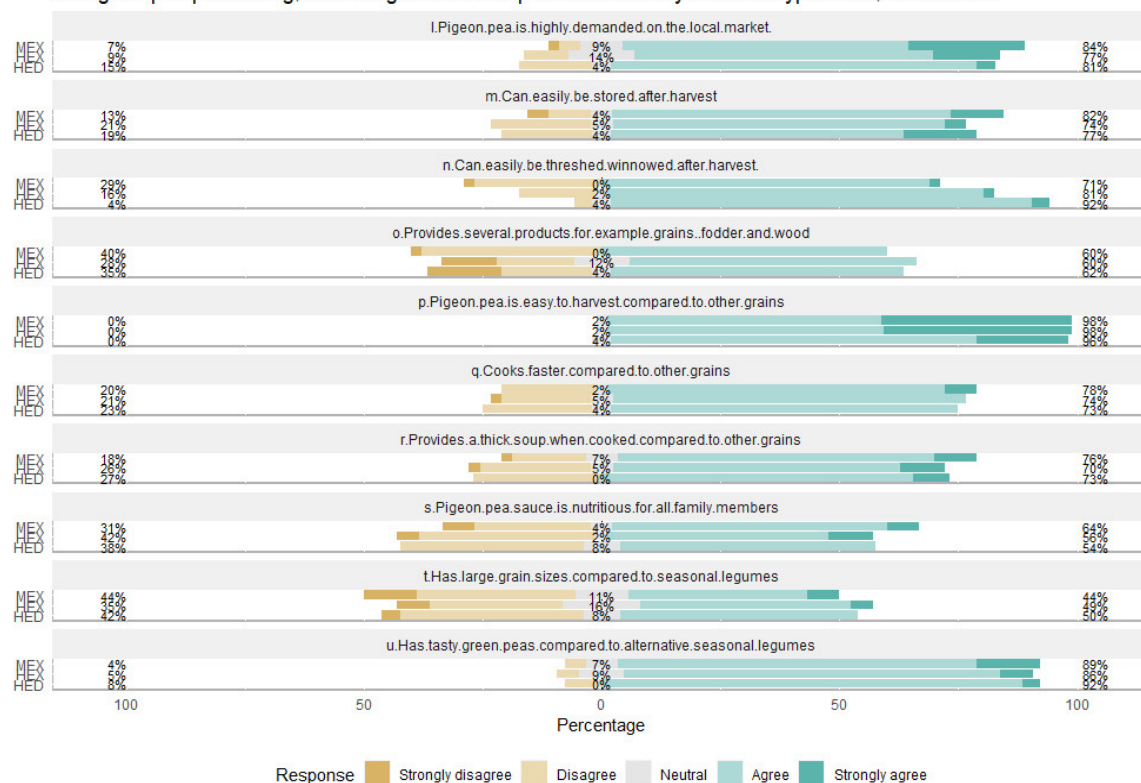

**Figure S2. (A,C):** Smallholders' perceptions of pigeon pea by resource type (the sample size was 257). Likert type rate; 1=strongly disagree, 2=disagree, 3=neutral, 4=agree and 5=strongly agree. The percentage on the left side indicate the share of respondents answering with 1 or 2 on the Likert scale. The percentage in the middle indicate the share of respondents answering with 3 (neutral) on the Likert scale. The percentages on the right side indicate the share of respondents answering with 4 or 5 (agreement) on the Likert scale. Pigeon pea production, processing, marketing and consumption attributes by farm type.

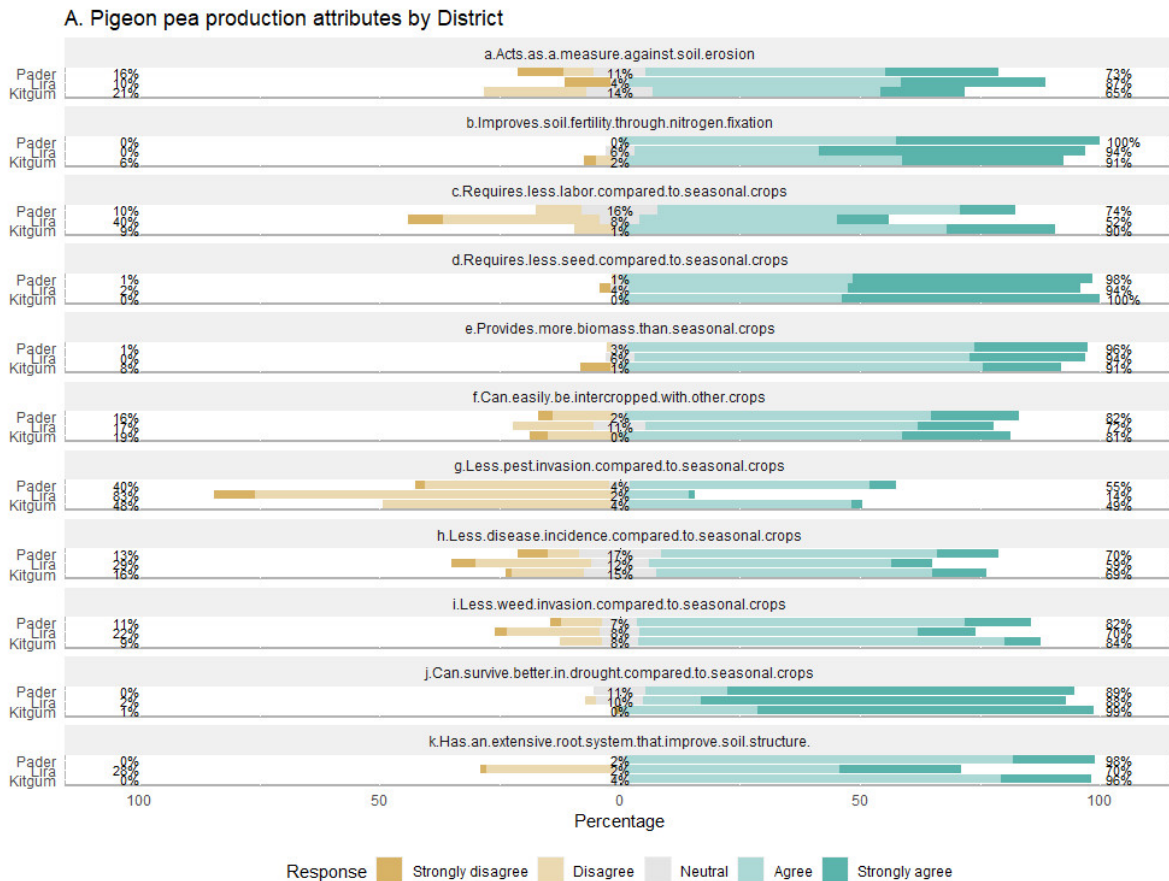

## B. Pigeon pea processing, marketing and consumption attributes by District

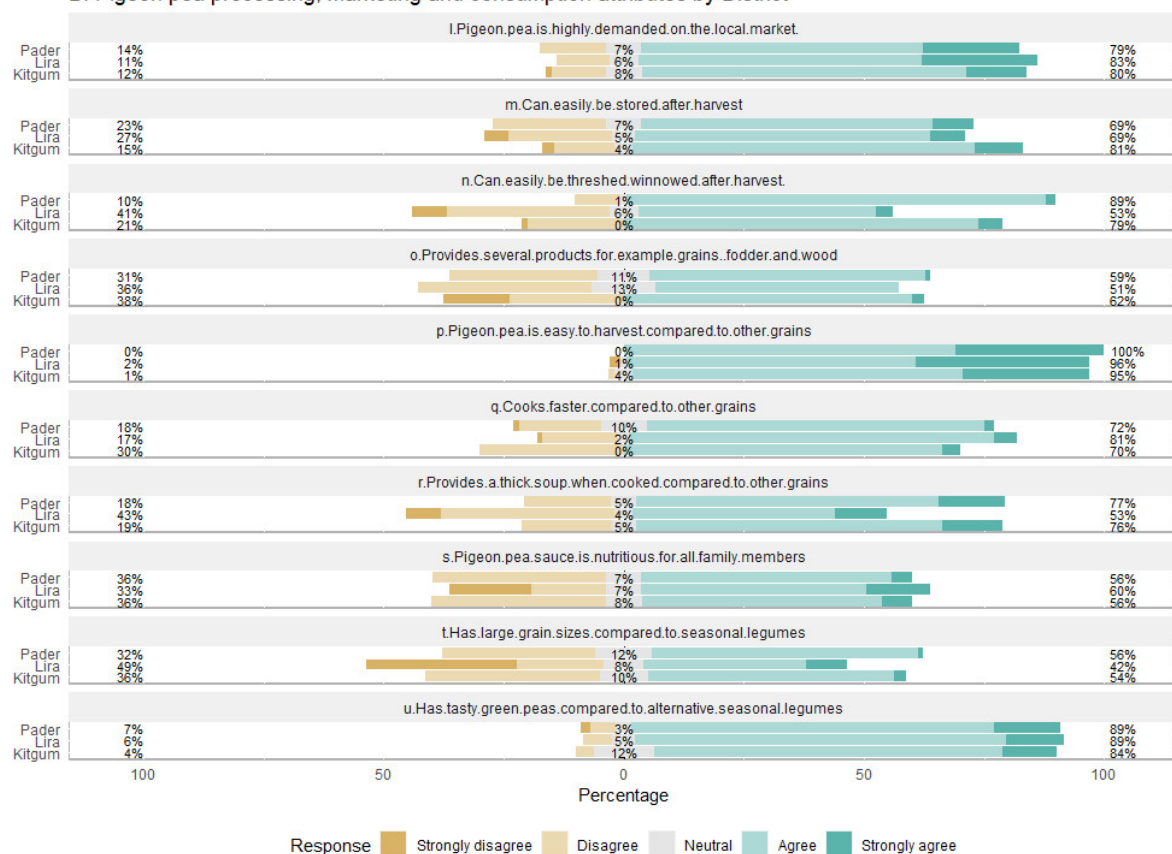

## C. Pigeon pea production attributes by gender of the household head

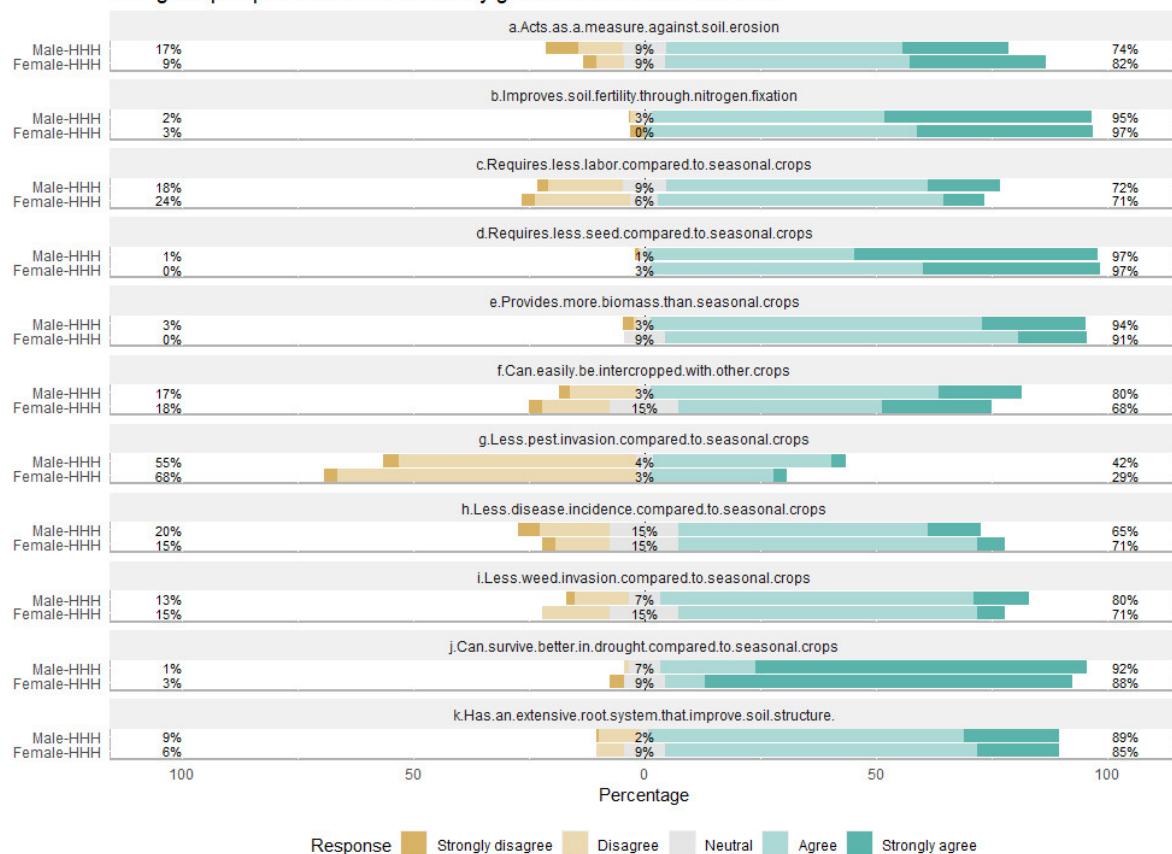

#### D. Pigeon pea processing, marketing and consumption attributes by gender of the household head

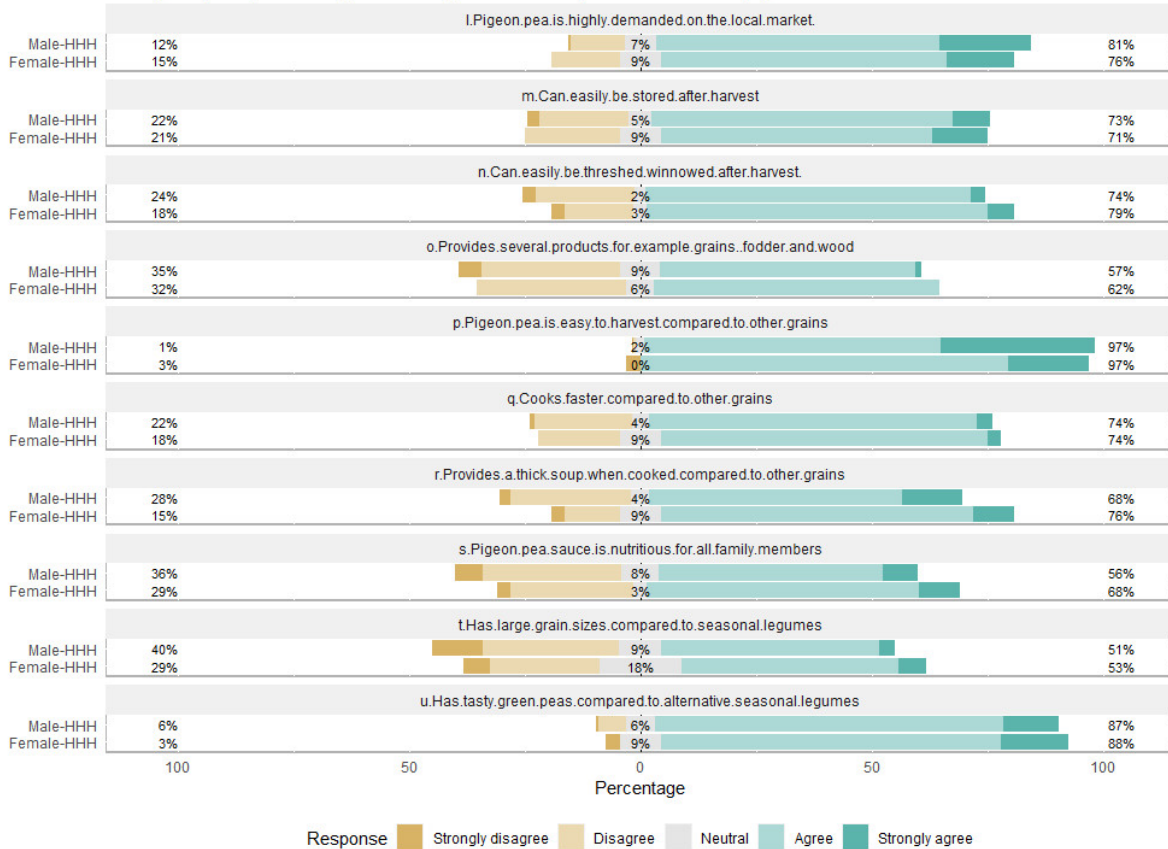

**Figure S3.** (A–D): Smallholders' perceptions of pigeon pea (the sample size was 257). Likert type rate; 1=strongly disagree, 2=disagree, 3=neutral, 4=agree and 5=strongly agree. The percentage on the left side indicate the share of respondents answering with 1 or 2 on the Likert scale. The percentage in the middle indicate the share of respondents answering with 3 (neutral) on the Likert scale. The percentages on the right side indicate the share of respondents answering with 4 or 5 (agreement) on the Likert scale. Pigeon pea production, processing, marketing and consumption attributes by district and gender of household head.
